# Supplementary material for: Characterization of Salmonella enterica Contamination in Pork and Poultry Meat from São Paulo/Brazil: Serotypes, Genotypes and Antimicrobial Resistance Profiles
Source: MDPI journal article supplement (doi:10.3390/pathogens11030358), 2022-03-16
Supplement: s1 [file s1]

|              |        |   |   |   |    |    |   |   |   |   |   |   |   |    |     |
|--------------|--------|---|---|---|----|----|---|---|---|---|---|---|---|----|-----|
| <b>M94</b>   | Wing   |   |   |   |    | 2  |   |   |   |   |   |   |   |    | 2   |
| <b>M97</b>   | Wing   |   |   |   |    |    |   |   |   | 3 |   |   |   |    | 3   |
| <b>M98</b>   | Thigh  |   |   | 1 |    |    |   |   |   |   |   |   |   |    | 1   |
| <b>M99</b>   | Chop   |   | 1 |   |    |    |   |   |   |   |   |   |   |    | 1   |
|              | Rib    |   | 2 |   |    |    |   |   |   |   |   |   |   |    | 2   |
|              | Thigh  |   |   |   |    |    |   |   |   | 2 |   |   |   |    | 2   |
|              | Wing   |   |   | 1 |    |    |   |   |   |   |   |   |   |    | 1   |
| <b>M101</b>  | Wing   |   |   | 1 |    |    |   |   |   |   |   |   |   |    | 1   |
| <b>M102</b>  | Chop   |   |   |   |    |    |   | 3 |   |   |   |   |   |    | 3   |
| <b>M104</b>  | Thigh  |   |   |   |    | 1  |   |   |   |   |   |   |   |    | 1   |
| <b>M106</b>  | Breast |   |   |   |    | 2  |   |   |   |   |   |   |   |    | 2   |
| <b>M107</b>  | Wing   |   |   |   |    | 2  |   |   |   |   |   |   |   |    | 2   |
| <b>M109</b>  | Breast |   |   |   |    | 2  |   |   |   |   |   |   |   |    | 2   |
|              | Thigh  |   |   |   |    | 2  |   |   |   |   |   |   |   |    | 2   |
|              | Wing   |   |   |   |    | 2  |   |   |   |   |   |   |   |    | 2   |
| <b>M113</b>  | Hamm   |   | 1 |   | 2  |    |   |   |   |   |   |   |   |    | 3   |
| <b>M114</b>  | Loin   |   |   |   | 3  |    |   |   |   |   |   |   |   |    | 3   |
|              | Rib    |   |   |   | 2  |    |   |   |   |   |   |   |   |    | 2   |
| <b>M115</b>  | Breast |   |   |   |    |    |   |   |   |   |   | 1 |   |    | 2   |
| <b>M116</b>  | Hamm   |   |   |   |    |    |   | 2 |   |   |   |   |   |    | 2   |
|              | Rib    |   |   |   |    |    |   | 2 |   |   |   |   |   |    | 2   |
| <b>M118</b>  | Breast |   |   |   |    | 2  |   |   |   |   |   |   |   |    | 2   |
| <b>M126</b>  | Wing   |   |   |   |    | 1  |   |   |   |   |   |   |   |    | 1   |
| <b>M127</b>  | Breast |   |   |   |    | 2  |   |   |   |   |   |   |   |    | 2   |
| <b>M129</b>  | Breast |   |   |   |    | 1  |   |   |   |   |   |   |   |    | 1   |
|              | Wing   |   |   |   |    | 2  |   |   |   |   |   |   |   |    | 2   |
|              | Rib    |   |   |   |    |    |   |   |   |   |   |   | 2 |    | 2   |
| <b>M130</b>  | Chop   |   |   |   |    |    |   |   |   |   |   |   |   | 2  | 2   |
| <b>Total</b> |        | 6 | 6 | 5 | 10 | 42 | 5 | 7 | 4 | 3 | 4 | 4 | 2 | 19 | 118 |
